# Supplementary material for: Identification of Tobacco-Related Cancer Diagnoses among Individuals with Psychiatric Disorders: A Population-Based Matched Cohort Study Using a Competing Risks Approach from British Columbia
Source: MDPI journal article supplement (doi:10.3390/curroncol28060415), 2021-11-24
Supplement: s1 [file s1]

## Article

# Identification of Tobacco-Related Cancer Diagnoses among Individuals with Psychiatric Disorders: A Population-Based Matched Cohort Study Using a Competing Risks Approach from British Columbia

Robert Olson <sup>1,2,\*</sup>, Mary McLay <sup>1,2</sup>, Jeremy Hamm <sup>3</sup> and Russell Callaghan <sup>4</sup>

**Supplementary Table S1.** Overall Survival estimate by psychiatric disorder.

|                                     | 5-year OS | 10-year OS | 15-year OS | 20-year OS | <i>p</i> -value |
|-------------------------------------|-----------|------------|------------|------------|-----------------|
| Control (Appendicitis)              | 98.0%     | 96.5%      | 95.0%      | 93.6%      | < 0.001         |
| Depression                          | 97.3%     | 95.2%      | 93.0%      | 91.2%      |                 |
| Schizophrenia and related disorders | 84.8%     | 78.7%      | 75.9%      | 72.5%      |                 |
| Bipolar disorder                    | 89.9%     | 83.8%      | 81.1%      | 75.6%      |                 |
| Anxiety disorders                   | 97.7%     | 95.6%      | 93.0%      | 91.0%      |                 |
| Multiple PD                         | 98.8%     | 96.8%      | 94.4%      | 91.7%      | < 0.001         |
| All PD                              | 97.6%     | 95.5%      | 93.1%      | 90.8%      |                 |
